# Supplementary material
Source: publisher figshare collection journal article supplement (https://sage.figshare.com/ndownloader/files/20105636)
Supplement: Supplementary file 1 [file 20105636]

## Supplementary 1: Risk of developing fibromyalgia and CFS including adjustment for depression and anxiety

|  | **Fibromyalgia** | | **Chronic Fatigue Syndrome** | |
| --- | --- | --- | --- | --- |
|  | **Exposed** | **Unexposed** | **Exposed** | **Unexposed** |
| **Number of Patients** | 18,296 | 73,663 | 18,454 | 73,861 |
| **Numbers of Outcomes** | 97 | 239 | 19 | 53 |
| **Person-years** | 59,657 | 286,786 | 60,315 | 288,024 |
| **Incidence Rate (per 1000 person year)** | 1.63 | 0.83 | 0.32 | 0.18 |
| **Incidence Rate Ratio (95% Confidence intervals)*** | 1.95 (1.54-2.47) | | 1.71 (1.01-2.89) | |
| ***p*-value** | <0.001 | | 0.044 | |
| **Adjusted Incidence Rate Ratio (95% Confidence intervals)**** | 1.39 (1.08-1.78) | | 1.46 (0.83 -2.55) | |
| ***p*-value** | 0.010 | | 0.189 | |

*Unadjusted incidence rate ratio

**Adjusted Incidence rate ratio: adjusted for BMI, age, smoking status, drinking status, anxiety, depression and Townsend deprivation index at baseline.
